# Supplementary material for: Satellite-based data for agricultural index insurance: a systematic quantitative literature review
Source: Copernicus journal article supplement (doi:10.5194/nhess-25-913-2025), 2025-02-28
Supplement: Supplementary file 1 [file nhess-25-913-2025-supplement.zip]

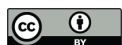

*Supplement of*

## **Satellite-based data for agricultural index insurance: a systematic quantitative literature review**

**Thuy T. Nguyen et al.**

*Correspondence to:* Thuy T. Nguyen ([thuy.nguyen@unisq.edu.au](mailto:thuy.nguyen@unisq.edu.au))

- [nhess-25-913-2025-supplement-title-page.pdf](#)
- [TableS1\\_SQLR Table\\_revised.xlsx](#)

The copyright of individual parts of the supplement might differ from the article licence.
