# Supplementary material for: Satellite-based data for agricultural index insurance: a systematic quantitative literature review
Source: Copernicus journal article supplement (doi:10.5194/nhess-25-913-2025), 2025-02-28
Supplement: Supplementary file 1 [file nhess-25-913-2025-supplement.zip]

## Sheet: Sheet1
No.	Author	Title	Year	Continent	Country	Crop_type	Data sources (non- or satellite-based	Index type	Earth_observation_satellite_data	Sensors	Spatial_resolution	Temporal_resolution	Period	Start year	End year	Length	Insurance_unit
1	Jangle N., Mehra M., Dror D.M.	"Climate Cost of Cultivation": A New Crop Index Method to Quantify Farmers' Cost of Climate Change Exemplified in Rural India	2016	Asia	India	Cereals	Satellite-based data	Satellite-based weather index			0.25, 1 & 1.9 degree		1979-1980, 2012-2013				farm
2	Md. Monirul Islam, Shusuke Matsushita, Ryozo Noguchi, Tofael Ahamed	A damage-based crop insurance system for flash flooding: a satellite remote sensing and econometric approach	2021	Asia	Bangladesh	Cereals	Satellite-based data	Satellite-based land surface index	EO high resolution	Landsat 8	15m		2016-2017	2016	2017	2	farm
3	ZiyueLi, ZhaoZhang, JingZhang, YuchuanLuo, LiangliangZhang	A new framework to quantify maize production risk from chilling injury in Northeast China	2021	Asia	People's Republic of China	Cereals	Satellite-based data	Composite index	EO medium resolution	GRASS LAI	1km	weekly	2000-2015	2000	2015	16	farm
4	Masiza, Wonga; Chirima, Johannes; Hamandawana, Hamisai; Kalumba, Ahmed; Magagula, Hezekiel	A Proposed Satellite-Based Crop Insurance System for Smallholder Maize Farming	2022	Africa	South Africa	Cereals	Satellite-based data	Satellite-based weather index
5	Joshua D Woodard, Apurba Shee, Andrew Mude	A Spatial Econometric Approach to Designing and Rating Scalable Index Insurance in the Presence of Missing Data	2016	Africa	Kenya	Pasture & Forages	Satellite-based data	Satellite-based land surface index	EO medium resolution	MODIS, AVHRR	250m	10-day	2001-2012	2001	2012	12	household
6	Kusuma A., Jackson B., Noy I.	A viable and cost-effective weather index insurance for rice in Indonesia	2018	Asia	Indonesia	Cereals	Satellite-based data	Satellite-based weather index
7	Roberto Dario Bacchini and Daniel Fernando Miguez	Agricultural risk management using NDVI pasture index-based insurance for livestock producers in south west Buenos Aires province	2015	South America	Argentina	Pasture & Forages	Satellite-based data	Satellite-based land surface index	EO medium resolution	LTDR, MODIS	5km	monthly	1981-2009	1981	2009	29	county
8	Pane StojanovskiWeimin DongMing WangTao YeShuangcai LiChristian P. Mortgat	Agricultural Risk Modeling Challenges in China: Probabilistic Modeling of Rice Losses in Hunan Province	2015	Asia	People's Republic of China	Cereals	Non-satellite-based data	Non-satellite-based index
9	Omar Valverde-Arias, Alberto Garrido, Antonio Saa-Requejo, Francisco CarreÃ±o, Ana MarÃ­a Tarquis,	Agro-ecological variability effects on an index-based insurance design for extreme events	2019	South America	Ecuador	Cereals	Satellite-based data	Satellite-based land surface index	EO medium resolution	MODIS	250m	2 weeks	2001-2017	2001	2017	17	AHZ
10	Kapsambelis, Dorothée; Moncoulon, David; Cordier, Jean	An Innovative Damage Model for Crop Insurance, Combining Two Hazards into a Single Climatic Index	2019	Europe	France	Cereals, Others	Non-satellite-based data	Non-satellite-based index
11	Asher Siebert	Analysis of Index Insurance Potential for Adaptation to Hydroclimatic Risks in the West African Sahel	2016	Africa	Niger, Burkina Faso, Mali	Cereals	Satellite-based data	Composite index	EO medium resolution	AVHRR	8km	10-day	1981-2012	1981	2012	32	country
12	Calum G. Turvey, Megan K. Mclaurin	Applicability of the Normalized Difference Vegetation Index (NDVI) in Index-Based Crop Insurance Design	2012	North America	United States of America	Others	Satellite-based data	Satellite-based land surface index	EO medium resolution	AVHRR	8km	2 weeks	1982-2003	1982	2003	22	county
13	Miranda PM Meuwissen, Michael Norton, Calum G Turvey, Gert-Jan van Sprundel	Applying weather index insurance to agricultural pest and disease risks	2016	North America	United States of America	Cereals	Non-satellite-based data	Non-satellite-based index
14	A. Castanda-Vera, L. Barrios, A. Garrido, I. MÃ­nguez,	Assessment of insurance coverage and claims in rainfall related risks in processing tomato in Western Spain	2014	Europe	Spain	Others	Non-satellite-based data	Non-satellite-based index
15	Masato Kawanishi, Nobuo Mimura	Assessment of insurance for paddy production: a case study in Indonesia	2015	Asia	Indonesia	Cereals	Non-satellite-based data	Non-satellite-based index
16	Tobias Dalhaus and Robert Finger	Can Gridded Precipitation Data and Phenological Observations Reduce Basis Risk of Weather Index–Based Insurance?	2016	Europe	Germany	Cereals	Non-satellite-based data	Non-satellite-based index
17	Kölle W., Martínez Salgueiro A., Buchholz M., Musshoff O.	Can satellite-based weather index insurance improve the hedging of yield risk of perennial non-irrigated olive trees in Spain?*	2021	Europe	Spain	Perennial crops	Satellite-based data	Satellite-based land surface index	EO medium resolution	MODIS	250m	2 weeks	2000-2015	2000	2015	16
18	Ephias M Makaudze, Mario J Miranda	Catastrophic drought insurance based on the remotely sensed normalised difference vegetation index for smallholder farmers in Zimbabwe	2010	Africa	Zimbabwe	Cereals, Others	Satellite-based data	Satellite-based land surface index	EO medium resolution	AVHRR	1km	10-day	1980-2000	1980	2000	21	district
19	JOHANNES MÖLLMANN, MATTHIAS BUCHHOLZ, AND OLIVER MUSSHOFF	Comparing the Hedging Effectiveness of Weather Derivatives Based on Remotely Sensed Vegetation Health Indices and Meteorological Indices	2019	Europe	Germany	Cereals	Satellite-based data	Composite index	EO medium resolution	AVHRR	4km	weekly	1995-2015	1995	2015	21	farm
20	Daniela Anghileri, Veronica Bozzini, Peter Molnar, Andrew A.J. Jamali, Justin Sheffield,	Comparison of hydrological and vegetation remote sensing datasets as proxies for rainfed maize yield in Malawi	2022	Africa	Malawi	Cereals	Satellite-based data	Composite index	EO medium resolution	MODIS NDVI EVI	1km	monthly	2001-2017	2001	2017	17	district
21	Thong Nguyen-Huy, Ravinesh C. Deo, Shahbaz Mushtaq, Jarrod Kath, Shahjahan Khan	Copula statistical models for analyzing stochastic dependencies of systemic drought risk and potential adaptation strategies	2019	Australia	Australia	Cereals	Non-satellite-based data	Non-satellite-based index
22	Erda Wang, Yang Yu, Bertis B.Little, Zuozhi Li	Crop Insurance Premium Design Based on Survival Analysis Model	2010	Asia	People's Republic of China	Cereals	Non-satellite-based data	Non-satellite-based index
23	Sommarat Chantarat, Andrew G. Mude, Christopher B. Barrett and Michael R. Carter	Designing Index-Based Livestock Insurance for Managing Asset Risk in Northern Kenya	2013	Africa	Kenya	Pasture & Forages	Satellite-based data	Satellite-based land surface index	EO medium resolution	AVHRR	8km	10-day	2000-2008	2000	2008	9	household
24	Tao Ye, Yijia Li, Yu Gao, Jiwei Wang, Miluo Yi,	Designing index-based livestock insurance for managing snow disaster risk in Eastern Inner Mongolia, China	2017	Asia	People's Republic of China	Pasture & Forages	Non-satellite-based data	Non-satellite-based index
25	Paresh Shirsath, Shalika Vyas, Pramod Aggarwal, Kolli N.Rao	Designing weather index insurance of crops for the increased satisfaction of farmers, industry and the government	2019	Asia	India	Cereals, Others	Non-satellite-based data	Non-satellite-based index
26	Elius Etienne, Naresh Devineni, Reza Khanbilvardi, Upmanu Lall,	Development of a Demand Sensitive Drought Index and its application for agriculture over the conterminous United States	2016	North America	United States of America	Cereals	Non-satellite-based data	Non-satellite-based index
27	Kölle W., Buchholz M., Musshoff O.	Do high-resolution satellite indices at field level reduce basis risk of satellite-based weather index insurance?	2021	Europe	Germany	Cereals	Satellite-based data	Satellite-based land surface index	EO high-medium resolution	MODIS, Landsat	250m	2 weeks	2000-2019	2000	2019	20	field and farm
28	Johannes MÖLLMANN, Matthias Buchholz, Wienand KÃ¶lle, Oliver Musshoff,	Do remotely-sensed vegetation health indices explain credit risk in agricultural microfinance?	2020	Africa	Madagascar	Cereals	Satellite-based data	Satellite-based land surface index	EO medium resolution	AVHRR	4km	weekly	1995-2015	1995	2015	21
29	Nathaniel Jensen,Quentin Stoeffler, Francesco Fava, Anton Vrieling, Clement Atzberger, Michele Meroni, Andrew Mude, Michael Carter	Does the design matter? Comparing satellite-based indices for insuring pastoralists against drought	2019	Africa	Kenya	Pasture & Forages	Satellite-based data	Satellite-based land surface index	EO medium resolution	MODIS	250m	10-day	2002-2015	2002	2015	14
30	Askar Choudhury, James Jones, Adolph Okine and Raquiba (Lena) Choudhury	Drought-Triggered Index Insurance Using Cluster Analysis of Rainfall Affected by Climate Change	2016	Africa	Ghana	Cereals	Non-satellite-based data	Non-satellite-based index
31	Anton Vrieling, Michele Meroni, Andrew G. Mude, Sommarat Chantarat, Caroline C. Ummenhofer, Kees (C.A.J.M.) de Bie,	Early assessment of seasonal forage availability for mitigating the impact of drought on East African pastoralists	2016	Africa	Kenya, Ethiopia	Pasture & Forages	Satellite-based data	Satellite-based land surface index	EO medium resolution	MODIS	250m	10-day	2001-2014	2001	2014	14
32	Ender M., Zhang R.	Efficiency of weather derivatives for Chinese agriculture industry	2015	Asia	People's Republic of China	Cereals	Non-satellite-based data	Non-satellite-based index
33	TRAVIS M. WILLIAMS	Evaluating Alternative Drought Indicators in a Weather Index Insurance Instrument	2019	North America	United States of America	Pasture & Forages	Non-satellite-based data	Non-satellite-based index
34	Zhou R., Li J.S.-H., Pai J.	Evaluating effectiveness of rainfall index insurance	2018	North America	United States of America	Cereals	Non-satellite-based data	Non-satellite-based index
35	Kenduiywo B.K., Carter M.R., Ghosh A., Hijmans R.J.	Evaluating the quality of remote sensing products for agricultural index insurance	2021	Africa	Kenya	Pasture & Forages	Satellite-based data	Composite index	EO medium resolution	MODIS, AVHRR	500m, 0.05 degree	weekly	2001-2019	2001	2019	19
36	Lucas De Oto, Anton Vrieling, Francesco Fava, Kees (C.A.J.M.) de Bie,	Exploring improvements to the design of an operational seasonal forage scarcity index from NDVI time series for livestock insurance in East Africa	2019	Africa	Kenya	Pasture & Forages	Satellite-based data	Satellite-based land surface index	EO medium resolution	MODIS	250m	10-day	2001-2017	2001	2017	17	ecological strata (county)
37	Emmanuel Eze, Atkilt Girma, Amanuel Zenebe, Jean Moussa Kourouma, Gebreyohannes Zenebe,	Exploring the possibilities of remote yield estimation using crop water requirements for area yield index insurance in a data-scarce dryland	2020	Africa	Ethiopia	Cereals	Non-satellite-based data	Non-satellite-based index
38	Jon Einar Flatnes, Michael R. Carter	Fail-safe index insurance without the cost: a satellite based conditional audit approach	2015	Africa	Tanzania	Cereals	Satellite-based data	Satellite-based land surface index	EO medium resolution	MODIS	250-500m	daily	2003-2012	2003	2012	10	farm
39	Osgood, Daniel; Powell, Bristol; Diro, Rahel; Farah, Carlos; Enenkel, Markus; Brown, Molly; Husak, Greg; Blakeley, S.; Hoffman, Laura; McCarty, Jessica	Farmer Perception, Recollection, and Remote Sensing in Weather Index Insurance: An Ethiopia Case Study	2018	Africa	Kenya	Others	Satellite-based data	Composite index	EO medium resolution	MODIS	250m	10-day	2000-2016	2000	2016	17	resampled to 10*10km
40	Raphael N Karuaihe, H Holly Wang, Douglas L Young, Yuehua Zhang	Farmers' demand for weather-based crop insurance contracts: the case of maize in south africa	2013	Africa	South Africa	Cereals	Non-satellite-based data	Non-satellite-based index
41	Emmanuel Eze, Atkilt Girma, Amanuel A. Zenebe, Gebreyohannes Zenebe,	Feasible crop insurance indexes for drought risk management in Northern Ethiopia	2020	Africa	Ethiopia	Cereals	Satellite-based data	Composite index	EO medium resolution	MODIS	250m	2 weeks	2015-2018	2015	2018	4
42	Sarah Conradt, Robert Finger, Martina SpÃ¶rri,	Flexible weather index-based insurance design	2015	Europe	Kazakhstan	Cereals	Non-satellite-based data	Non-satellite-based index
43	Karthikeyan Matheswaran, Niranga Alahacoon, Rajesh Pandey & Giriraj Amarnath	Flood risk assessment in South Asia to prioritize flood index insurance applications in Bihar, India	2019	Asia	India	Cereals	Satellite-based data	Satellite-based land surface index	EO medium resolution	MODIS	500m	weekly	2000-2015	2000	2015	16	farm
44	Anton Vrieling, Michele Meroni, Apurba Shee, Andrew G. Mude, Joshua Woodard, C.A.J.M. (Kees) de Biea, Felix Rembold	Historical extension of operational NDVI products for livestock insurance in Kenya	2014	Africa	Kenya	Pasture & Forages	Satellite-based data	Satellite-based land surface index	EO medium resolution	MODIS, SPOT VGT, AVHRR	250m - 8km	2 weeks	1981-2012	1981	2012	32	division
45	Hong Li, Lysa Porth, Ken Seng Tan, Wenjun Zhu,	Improved index insurance design and yield estimation using a dynamic factor forecasting approach	2021	North America	United States of America	Cereals	Non-satellite-based data	Non-satellite-based index
46	Mehdi H. Afshar et al	Improving the Performance of Index Insurance Using Crop Models and Phenological Monitoring	2021	Asia	India	Cereals	Satellite-based data	Satellite-based land surface index	EO high resolution	Landsat 8, Sentinel 2	30m	daily	2019-2019	2019	2019	1	plot
47	Jarrod Kath, Shahbaz Mushtaq, Ross Henry, Adewuyi Adeyinka, RogerStone	Index insurance benefits agricultural producers exposed to excessive rainfall risk	2018	Australia	Australia	Perennial crops	Non-satellite-based data	Non-satellite-based index
48	Bobojonov I., Aw-Hassan A., Sommer R.	Index-based insurance for climate risk management and rural development in Syria	2014	Africa	Syria	Cereals	Satellite-based data	Satellite-based land surface index	EO medium resolution	MODIS	250m	2 weeks	2001-2010	2001	2010	10	district
49	Vroege W., Bucheli J., Dalhaus T., Hirschi M., Finger R.	Insuring crops from space: The potential of satellite-retrieved soil moisture to reduce farmers' drought risk exposure	2021	Europe	Germany	Cereals	Satellite-based data	Satellite-based land surface index
50	Joshua D. Woodard	Integrating high resolution soil data into federal crop insurance policy: Implications for policy and conservation	2016	North America	United States of America	Cereals	Non-satellite-based data	Non-satellite-based index
51	Roberta Rigo, Paulo Santos, Vito Frontuto,	Landscape heterogeneity, basis risk and the feasibility of index insurance: An analysis of rice in upland regions of Southeast Asia	2022	Asia	Laos	Cereals	Satellite-based data	Satellite-based land surface index	EO medium resolution	MODIS	250m	2 weeks	2001-2019	2001	2019	19	village
52	Abrego-Perez Adriana L., Penagos-Londoño G.I.	Mixture modeling segmentation and singular spectrum analysis to model and forecast an asymmetric condor-like option index insurance for Colombian coffee crops	2022	South America	Colombia	Perennial crops	Non-satellite-based data	Non-satellite-based index
53	Sarvia F , De Petris S & Borgogno-Mondino E	Multi-scale remote sensing to support insurance policies in agriculture: from mid-term to instantaneous deductions	2020	Europe	Italy	Cereals	Satellite-based data	Satellite-based land surface index	EO high-medium resolution	MODIS, Sentinel 2	250m	2 weeks	2000-2018	2000	2018	19
54	Ricardo Nogales & Pamela Cordova	On the Advantages and Feasibility of Weather Index-Based Crop Insurance Schemes in Bolivia	2019	South America	Bolivia	Cereals, Others	Non-satellite-based data	Non-satellite-based index
55	Jun Furuya, Keisuke Omori & Hideo Aizaki	Optimum insurance contract of flood damage index insurance for rice farmers in Myanmar	2021	Asia	Myanmar	Cereals	Non-satellite-based data	Non-satellite-based index
56	Murthy C.S., Poddar M.K., Choudhary K.K., Pandey V., Srikanth P., Ramasubramanian S., Senthil Kumar G.	Paddy crop insurance using satellite-based composite index of crop performance	2022	Asia	India	Cereals	Satellite-based data	Satellite-based land surface index	EO medium resolution	Sentinel 1-2-3, SPOT Proba-V	300m	10-day	2016-2019	2016	2019	4	group of villages (Gram Panchayat)
57	Dalhaus, T., Musshoff, O. & Finger, R	Phenology Information Contributes to Reduce Temporal Basis Risk in Agricultural Weather Index Insurance	2018	Europe	Germany	Cereals	Non-satellite-based data	Non-satellite-based index
58	Ulla Kellner, Oliver Musshoff	Precipitation or water capacity indices? An analysis of the benefits of alternative underlyings for index insurance	2011	Europe	Germany	Cereals	Non-satellite-based data	Non-satellite-based index
59	Antoine Leblois, Philippe Quirion, Benjamin Sultan,	Price vs. weather shock hedging for cash crops: Ex ante evaluation for cotton producers in Cameroon	2014	Africa	Cameroon	Others	Satellite-based data	Composite index	EO medium resolution	AVHRR	8km	2 weeks	1981-2006	1981	2006	26	village
60	SIMON E COOK, MYLES J FISHER, PETER G JONES, PETER LÃ¤DERACH, JACQUELINE DÃAZ NIETO	Rainfall index insurance to help smallholder farmers manage drought risk	2010	North America	Honduras	Others	Non-satellite-based data	Non-satellite-based index
61	Muneepeerakul C.P., Muneepeerakul R., Huffaker R.G.	Rainfall Intensity and Frequency Explain Production Basis Risk in Cumulative Rain Index Insurance	2017	North America	United States of America	Cereals	Non-satellite-based data	Non-satellite-based index
62	Zhang J., Zhang Z., Tao F.	Rainfall-Related Weather Indices for Three Main Crops in China	2020	Asia	People's Republic of China	Cereals	Non-satellite-based data	Non-satellite-based index
63	Rex J. Rowley, Kevin P. Price, Jude H. Kastens,	Remote Sensing and the Rancher: Linking Rancher Perception and Remote Sensing	2007	North America	United States of America	Pasture & Forages	Satellite-based data	Satellite-based land surface index	EO medium resolution	AVHRR	1km	2 weeks	1989-2003	1989	2003	15	county
64	C. Brock Porth, Lysa Porth, Wenjun Zhu, Milton Boyd, Ken Seng Tan & Kai Liu	Remote Sensing Applications for Insurance: A Predictive Model for Pasture Yield in the Presence of Systemic Weather	2020	North America	Canada	Pasture & Forages	Satellite-based data	Satellite-based land surface index	EO medium resolution	MODIS, AVHRR	250,500m, 1km	daily	2002-2016	2002	2016	15
65	C.S. Murthy, M.K. Poddar, Karun Kumar Choudhary, P. Srikanth, Varun Pandey, Siddesh Ramasubramanian, G. Senthil Kumar,	Remote sensing based crop insurance for jute (Corchorus olitorius) crop in India	2022	Asia	India	Others	Satellite-based data	Composite index	EO medium resolution	Sentinel 1-2-3, SPOT Proba-V	300m	10-day	2017-2020	2017	2020	4	group of villages (Gram Panchayat)
66	Stefan Hochrainer-Stigler, Marijn van der Velde, Steffen Fritz, Georg Pflug,	Remote sensing data for managing climate risks: Index-based insurance and growth related applications for smallhold-farmers in Ethiopia	2014	Africa	Ethiopia	Cereals	Satellite-based data	Composite index	EO medium resolution	AVHRR	8km	2 weeks	1996-2005	1996	2005	10	zone
67	Omar Roberto Valverde-Arias1, Paloma Esteve1,2, Ana María Tarquis1,3, and Alberto Garrido1,2	Remote sensing in an index-based insurance design for hedging economic impacts on rice cultivation	2020	South America	Ecuador	Cereals	Satellite-based data	Satellite-based land surface index	EO medium resolution	MODIS	250m	2 weeks	2001-2017	2001	2017	17
68	R. Bokusheva, F. Kogan, I. Vitkovskaya, S. Conradt, M. Batyrbayeva,	Satellite-based vegetation health indices as a criteria for insuring against drought-related yield losses	2016	Asia	Kazakhstan	Cereals	Satellite-based data	Satellite-based land surface index	EO medium resolution	AVHRR	16km	weekly	1982-2010	1982	2010	29	county
69	Wei-ping LOU, Xin-fa QIU, Li-hong WU, Hu-ping NI, Qi-yi TANG, Yu-ding MAO,	Scheme of Weather-Based Indemnity Indices for Insuring Against Freeze Damage to Citrus Orchards in Zhejiang, China	2009	Asia	People's Republic of China	Others	Non-satellite-based data	Non-satellite-based index
70	Ndegwa M.K., Shee A., Turvey C., You L.	Sequenced crop evapotranspiration and water requirement in developing a multitrigger rainfall index insurance and risk-contingent credit	2022	Africa	Kenya	Cereals	Non-satellite-based data	Non-satellite-based index
71	Jarrod Kath, Shahbaz Mushtaq, Ross Henry, Adewuyi Ayodele Adeyinka, Roger Stone, Torben Marcussen, Louis Kouadio	Spatial variability in regional scale drought index insurance viability across Australia’s wheat growing regions	2019	Australia	Australia	Cereals	Non-satellite-based data	Non-satellite-based index
72	Conradt S., Finger R., Bokusheva R.	Tailored to the extremes: Quantile regression for index-based insurance contract design	2015	Asia	Kazakhstan	Cereals	Non-satellite-based data	Non-satellite-based index
73	Bucheli J., Dalhaus T., Finger R.	Temperature effects on crop yields in heat index insurance	2022	Europe	Germany	Cereals	Non-satellite-based data	Non-satellite-based index
74	Milton Boyd, Brock Porth, Lysa Porth, Ken Seng Tan, Shuo Wang, Wenjun Zhu	The Design of Weather Index Insurance Using Principal Component Regression and Partial Least Squares Regression: The Case of Forage Crops	2020	North America	Canada	Pasture & Forages	Non-satellite-based data	Non-satellite-based index
75	Milton Boyd, Ke Wang, Qiao Zhang	The Effectiveness of Area-Based Yield Crop Risk Insurance in China	2011	Asia	People's Republic of China	Cereals	Non-satellite-based data	Non-satellite-based index
76	Milton Boyd, Brock Porth, Lysa Porth, Daniel Turenne	The Impact of Spatial Interpolation Techniques on Spatial Basis Risk for Weather Insurance: An Application to Forage Crops	2019	North America	Canada	Pasture & Forages	Non-satellite-based data	Non-satellite-based index
77	Bucheli J., Dalhaus T., Finger R.	The optimal drought index for designing weather index insurance	2021	Europe	Germany	Cereals	Non-satellite-based data	Non-satellite-based index
78	Black, Emily; Tarnavsky, Elena; Maidment, Ross; Greatrex, Helen; Mookerjee, Agrotosh; Quaife, Tristan; Brown, Matthew	The Use of Remotely Sensed Rainfall for Managing Drought Risk: A Case Study of Weather Index Insurance in Zambia	2016	Africa	Zambia	Others	Satellite-based data	Composite index
79	Hohl R., Jiang Z., Tue Vu M., Vijayaraghavan S., Liong S.-Y.	Using a regional climate model to develop index-based drought insurance for sovereign disaster risk transfer	2021	Asia	Indonesia	Cereals	Non-satellite-based data	Non-satellite-based index
80	Raushan Bokusheva	Using copulas for rating weather index insurance contracts	2018	Asia	Kazakhstan	Cereals	Non-satellite-based data	Non-satellite-based index
81	Andrea MartÃ­nez Salgueiro,	Weather index-based insurance as a meteorological risk management alternative in viticulture	2019	Europe	Spain	Perennial crops	Non-satellite-based data	Non-satellite-based index
82	Sarvarbek Eltazarov, Ihtiyor Bobojonov, Thomas Glauben, Lena Kuhn	Improving risk reduction potential of weather index insurance by spatially downscaling gridded climate data - a machine learning approach	2023	Asia	Mongolia, Kazakhstan	Cereals	Satellite-based data	Composite index
83	Heimfarth L.E., Musshoff O.	Weather index-based insurances for farmers in the North China Plain: An analysis of risk reduction potential and basis risk	2011	Asia	People's Republic of China	Cereals	Non-satellite-based data	Non-satellite-based index
84	Wang W.; Wang W.; Wang K.; Zhao Y.; Yu R.	Remote Sensing Application in Pure Premium Rate-Making of Winter Wheat Crop Insurance	2023	Asia	People's Republic of China	Cereals	Satellite-based data	Satellite-based land surface index	EO medium resolution	MODIS	500m	8-day	2007-2017	2007	2017	11	farm
85	Murthy C.S.; Choudhary K.K.; Pandey V.; Srikanth P.; Ramasubramanian S.; Kumar G.S.; Poddar M.K.; Milesi C.; Nemani R.	Transformative crop insurance solution with big earth data: Implementation for potato in India	2024	Asia	India	Others	Satellite-based data	Composite index	EO high resolution	Sentinel 1-2-3, SPOT Proba-V	300m	10-day	2016-2019	2016	2019	4	farm
86	Rina Wu, Yue Yang	Drought disaster risk assessment and yield insurance pricing of maize: a case study of Liaoning Province, China	2024	Asia	People's Republic of China	Cereals	Satellite-based data	Satellite-based weather index			0.5 degree	monthly	2001-2021	2001	2021	22
87	Nguyen-Huy, Thong; Kath, Jarrod; Kouadio, Louis; King, Rachel; Mushtaq, Shahbaz; Barratt, Jonathan	Integrating rainfall index-based insurance with optimal crop management strategies can reduce financial risks for Australian dryland cotton farmers	2024	Australia	Australia	Others	Non-satellite-based data	Non-satellite-based index
88	Cao, W; Duan, CF; Yang, TM; Wang, S	Higher Heat Stress Increases the Negative Impact on Rice Production in South China: A New Perspective on Agricultural Weather Index Insurance	2022	Asia	People's Republic of China	Cereals	Non-satellite-based data	Non-satellite-based index
89	Miller, SE; Adams, EC; Markert, KN; Ndungu, L; Ellenburg, WL; Anderson, ER; Kyuma, R; Limaye, A; Griffin, R; Irwin, D	Assessment of a Spatially and Temporally Consistent MODIS Derived NDVI Product for Application in Index-Based Drought Insurance	2020	Africa	Kenya	Pasture & Forages	Satellite-based data	Satellite-based land surface index	EO medium resolution	MODIS	250m	10-day	2003-2016	2003	2016	14	UAI (Unit Area Insurance ~2600km2)
